# Supplementary material
Source: bioRxiv or medRxiv preprint supplement (https://www.biorxiv.org/highwire/filestream/94871/field_highwire_adjunct_files/3/242834-4.pdf)

AM

□ No ■ Yes

Pie Colours

- Stable Non-AM Class: Species without AM
- Stable Non-AM Class: Species with AM
- Labile Class: Species without AM
- Labile Class: Species with AM
- Stable AM Class: Species without AM
- Stable AM Class: Species with AM

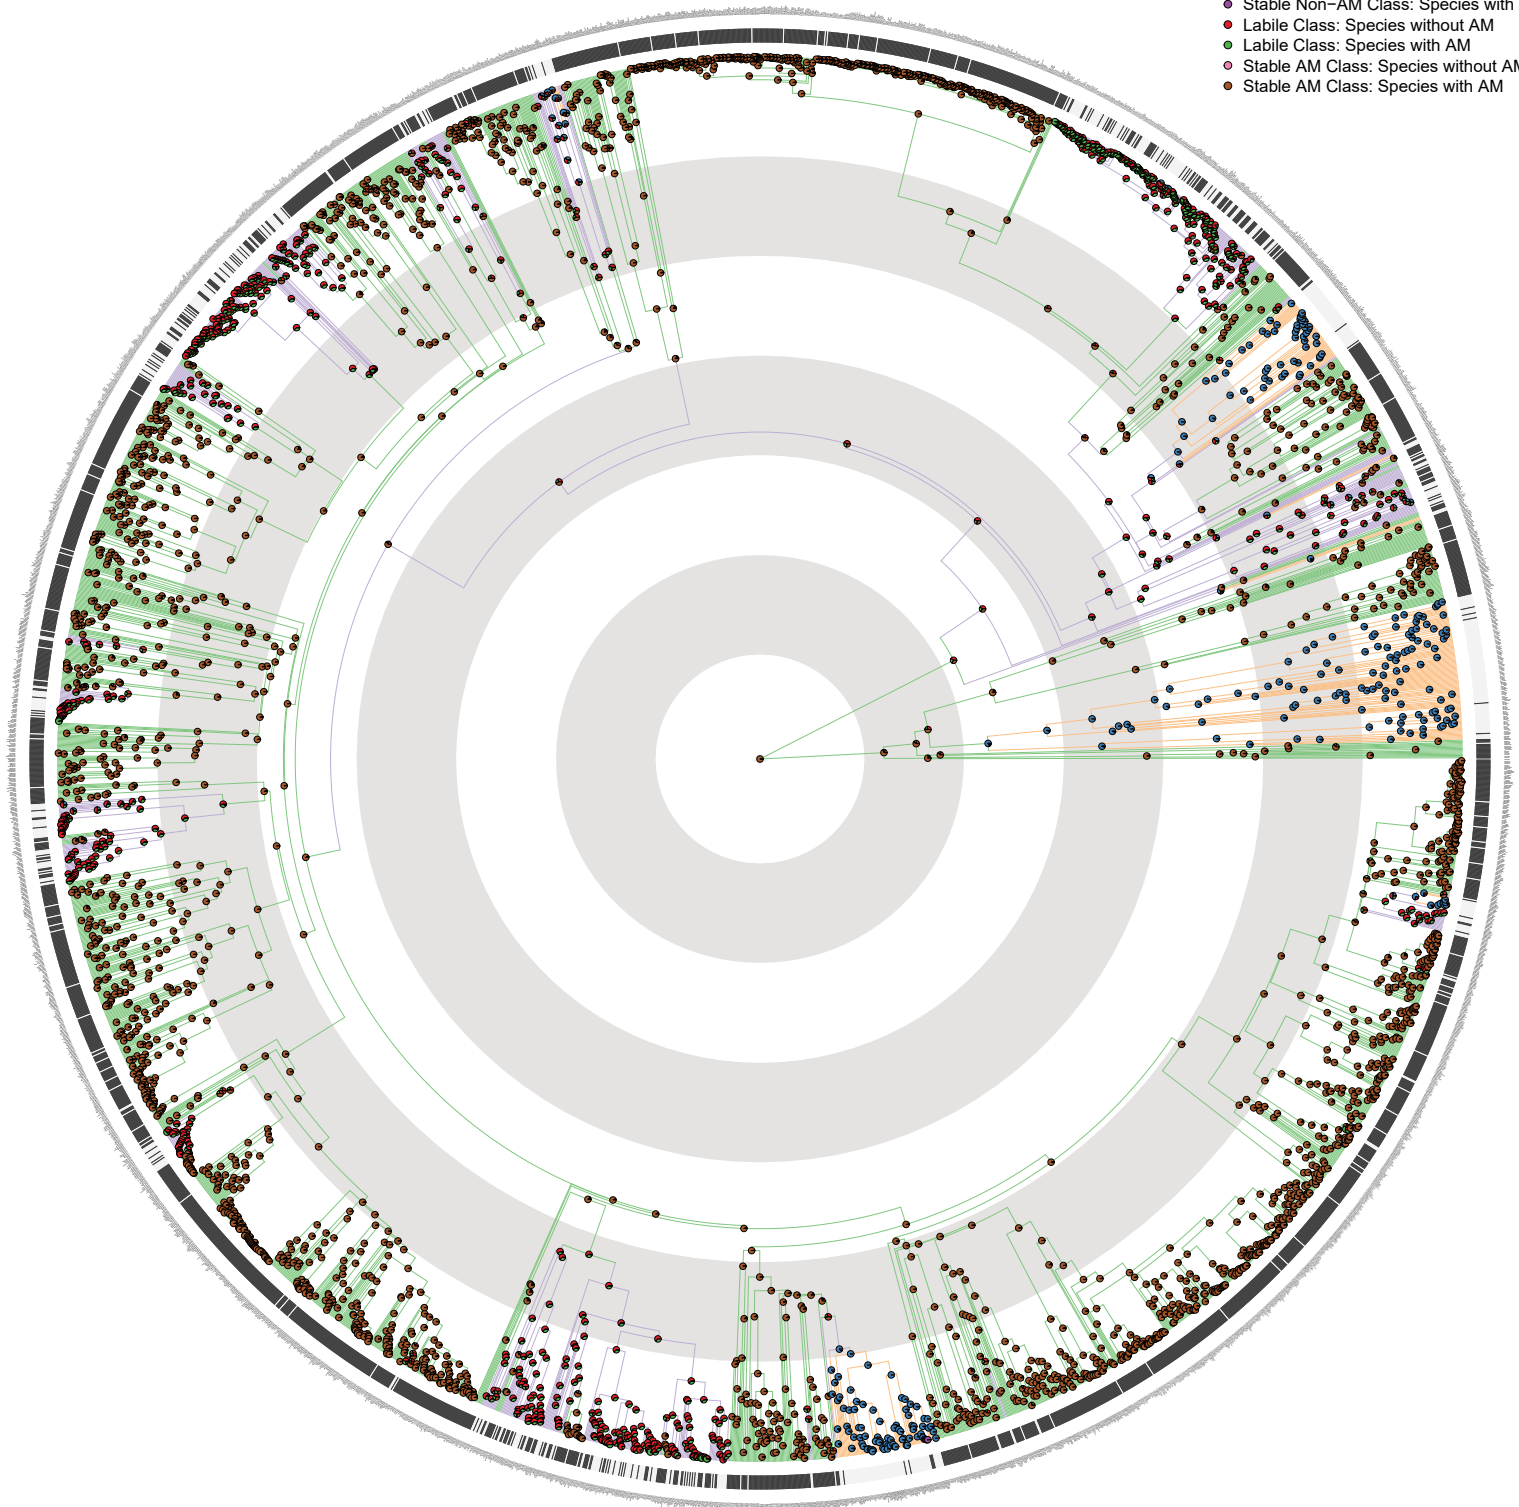

Supplement: Supplementary file [file 242834-4.pdf]
